# Supplementary material
Source: ML conference proceedings conference paper supplement (https://proceedings.neurips.cc/paper_files/paper/2018/hash/2c6a0bae0f071cbbf0bb3d5b11d90a82-Abstract.html)
Supplement: Supplementary file [file 2c6a0bae0f071cbbf0bb3d5b11d90a82-Supplemental.zip]

## Supplementary Material — Pipe-SGD: A Decentralized Pipelined SGD Framework for Distributed Deep Net Training

### A Proof of Convergence

To prove the convergence of Pipe-SGD for convex objective functions we adapt the derivation from parameter-server based asynchronous training [23, 15].

Specifically, by inserting  $K - 1$  virtual states of the parameters before the first actual parameter update in Alg. 1, we can mathematically formulate the parameter update in Pipe-SGD as follows:

**Proposition 1** *In Pipe-SGD with iteration dependency of  $K$ , parameters are updated as:*

$$\begin{cases} w[1] \triangleq \text{initial parameters} \\ w[t] = w[1], & t \in [2, K] \\ w[t] = w[t-1] - \eta[t-1]g[t-K], & t \in [K+1, T], \end{cases} \quad (8)$$

*In other words, there is a constant delay of  $K - 1$  steps between gradient computation and its application for a weight update.*

We note that this update is identical to that of the parameter-server proposed in [23], in which  $K$  workers upload their gradients to the server in a round-robin manner, and the parameters are updated using the gradient uploaded  $K - 1$  iterations ago.

Therefore, the convergence of Pipe-SGD can be derived using the same methods applied in [23, 15]. For instance, using [23], we confirm the convergence of Pipe-SGD for strongly convex functions, and find a rate of  $O(\frac{\log T}{T})$  for gradient descent. Moreover, we can reduce the above parameter update model to a special case in SSP [15] with  $K$  workers and an iteration drift factor of  $s = 1$  to show that the convergence rate of Pipe-SGD training for standard convex functions via SGD is  $8FL\sqrt{\frac{K}{T}}$ , where  $F$  and  $L$  are constants regarding gradient distance and Lipschitz continuous, respectively.
